# Supplementary material for: Delayed Addition of Template Molecules Enhances the Binding Properties of Diclofenac-Imprinted Polymers
Source: Polymers (Basel). 2020 May 21;12(5):1178. doi: 10.3390/polym12051178 (PMC7285371; doi:10.3390/polym12051178)
Supplement: Supplementary file 1 [file polymers-12-01178-s001.pdf]

**Figure S1.** Dynamic light scattering of polymerization mixtures at 10 (blue line), 15 (green line) and 20 (red line) minutes

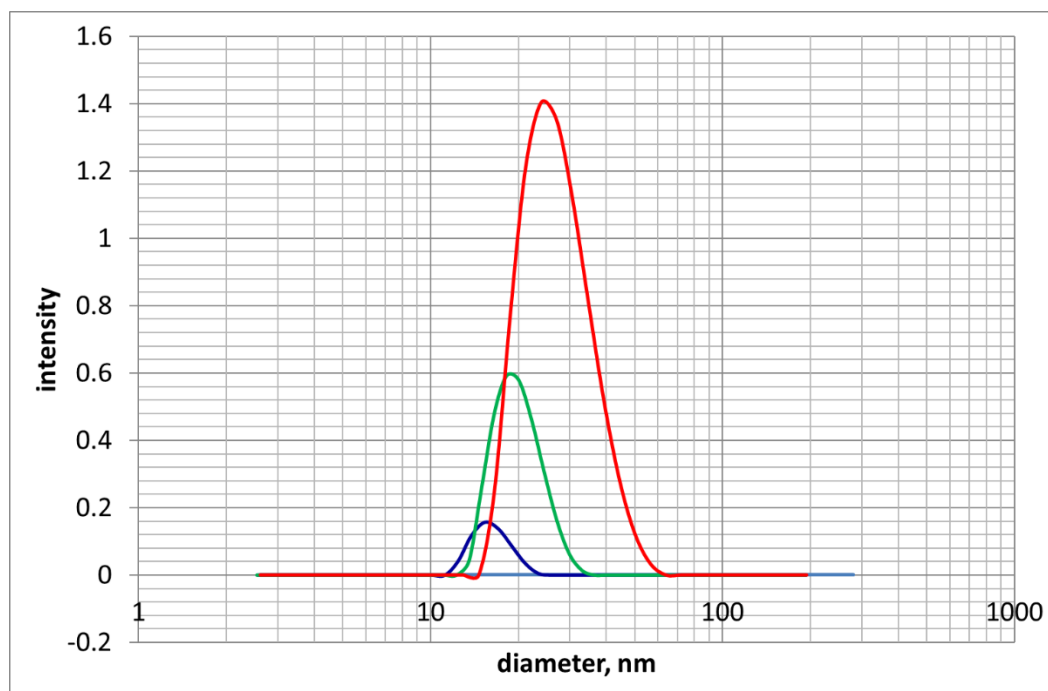

**Table S1.** Statistical evaluation of ligand binding to polymers. MIP were compared to NIP by calculating the Student's t-values at confidence level of 0.05. t-values denoting binding properties statistically equivalent are underlined.

|        | Diclofenac   |              | Mefenamic acid |              |
|--------|--------------|--------------|----------------|--------------|
|        | $K_{eq}$     | $B_{max}$    | $K_{eq}$       | $B_{max}$    |
| MIP-0  | 3.427        | 4.075        | 7.819          | 5.200        |
| MIP-5  | 4.777        | 3.721        | 24.750         | 13.157       |
| MIP-10 | 8.476        | 7.136        | 3.651          | 4.257        |
| MIP-15 | 3.426        | 5.156        | 4.443          | 9.945        |
| MIP-20 | 2.821        | <u>0.247</u> | 4.210          | 2.314        |
| MIP-30 | <u>1.925</u> | <u>1.448</u> | <u>2.052</u>   | <u>1.819</u> |

**Table S2.** Statistical evaluation of ligand binding to polymers. Diclofenac was compared to mefenamic acid by calculating the Student's t-values at confidence level of 0.05. t-values denoting binding properties statistically equivalent are underlined.

|        | $K_{eq}$     | $B_{max}$    |
|--------|--------------|--------------|
| NIP    | <u>0.653</u> | 2.714        |
| MIP-0  | 2.169        | 5.230        |
| MIP-5  | 2.505        | 2.423        |
| MIP-10 | 2.628        | <u>1.935</u> |
| MIP-15 | <u>1.253</u> | <u>1.462</u> |
| MIP-20 | <u>0.405</u> | <u>0.938</u> |
| MIP-30 | <u>0.673</u> | <u>1.965</u> |

**Table S3.** Statistical evaluation of imprinting factors. IF for diclofenac and mefenamic acid were compared to IF=1 for NIP by calculating the Student's t-values at confidence level of 0.05. t-values denoting IFs statistically equivalent to unit (no imprinting) are underlined.

|        | Diclofenac   | Mefenamic acid |
|--------|--------------|----------------|
| MIP-0  | 3.509        | 6.003          |
| MIP-5  | 4.955        | 15.902         |
| MIP-10 | 7.539        | 6.276          |
| MIP-15 | 3.448        | 4.529          |
| MIP-20 | 2.904        | 4.369          |
| MIP-30 | <u>1.991</u> | <u>2.190</u>   |
